# Supplementary material
Source: MDPI journal article supplement (https://www.mdpi.com/2073-4433/13/7/1155)

## Supplementary Figures

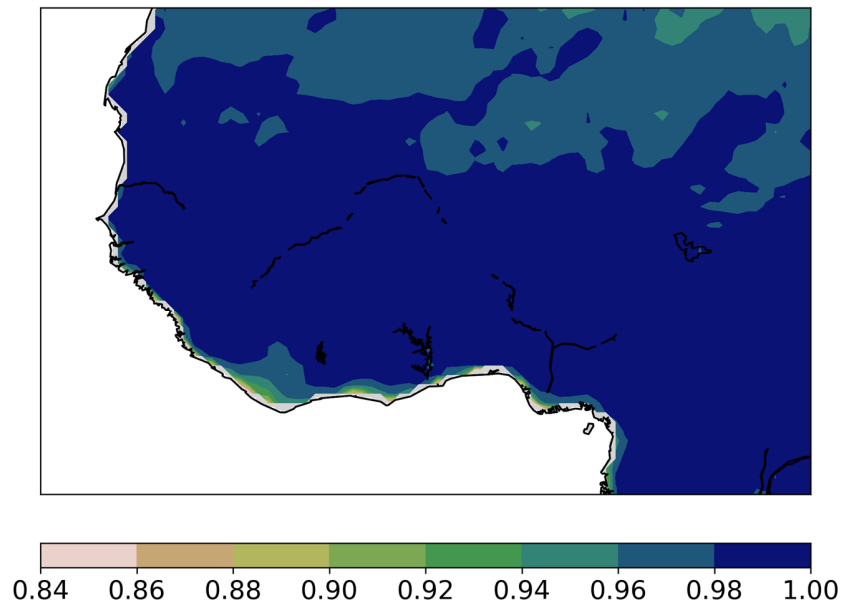

Figure S1: Spatial correlation between CWD (mm/day) derived from Hargreaves (HETo) and Baier-Robertson (BRETo)

(a)

Bias of HETo (CWD) between RCM and Obs  
over West Africa

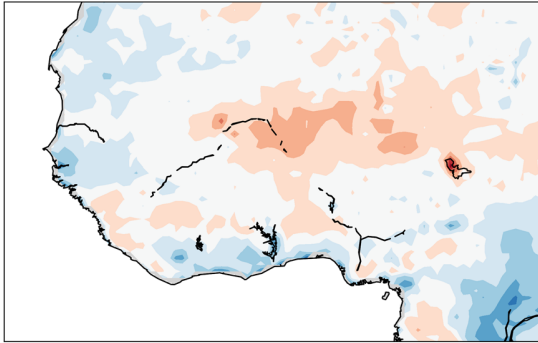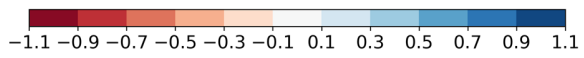

(b)

Bias of BRETo (CWD) between RCM and Obs  
over West Africa

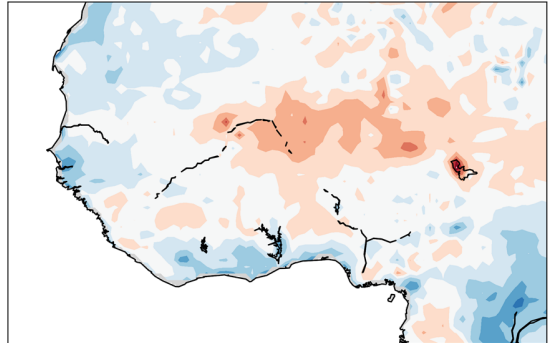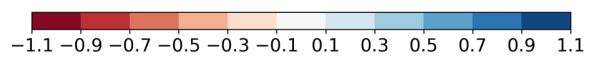

Figure S2: Spatial difference between modelled and observed CWD (mm/day) for (a) HETo and (b) BRETo.

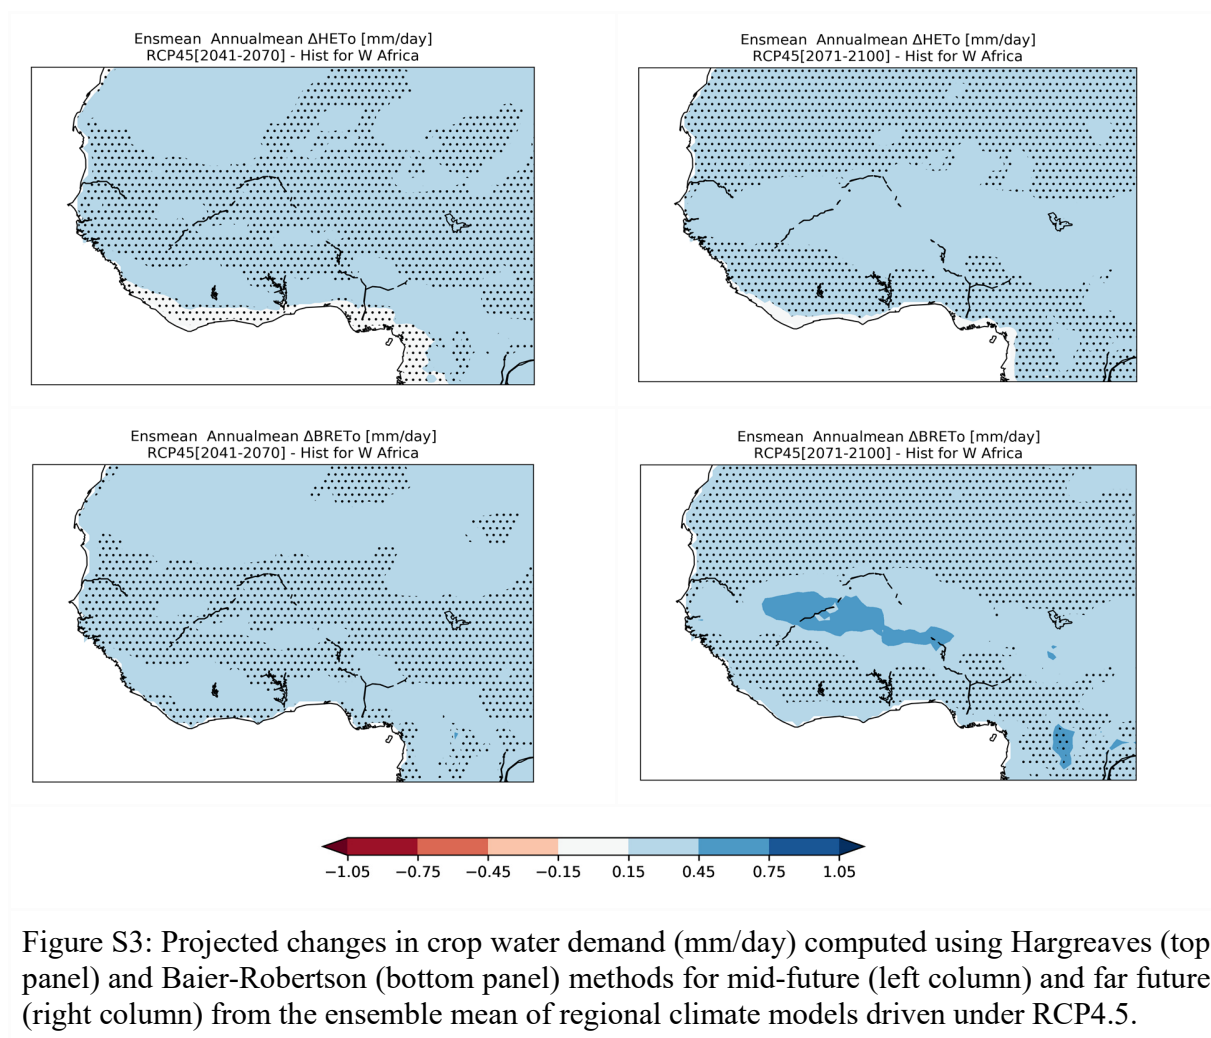

Figure S3: Projected changes in crop water demand (mm/day) computed using Hargreaves (top panel) and Baier-Robertson (bottom panel) methods for mid-future (left column) and far future (right column) from the ensemble mean of regional climate models driven under RCP4.5.

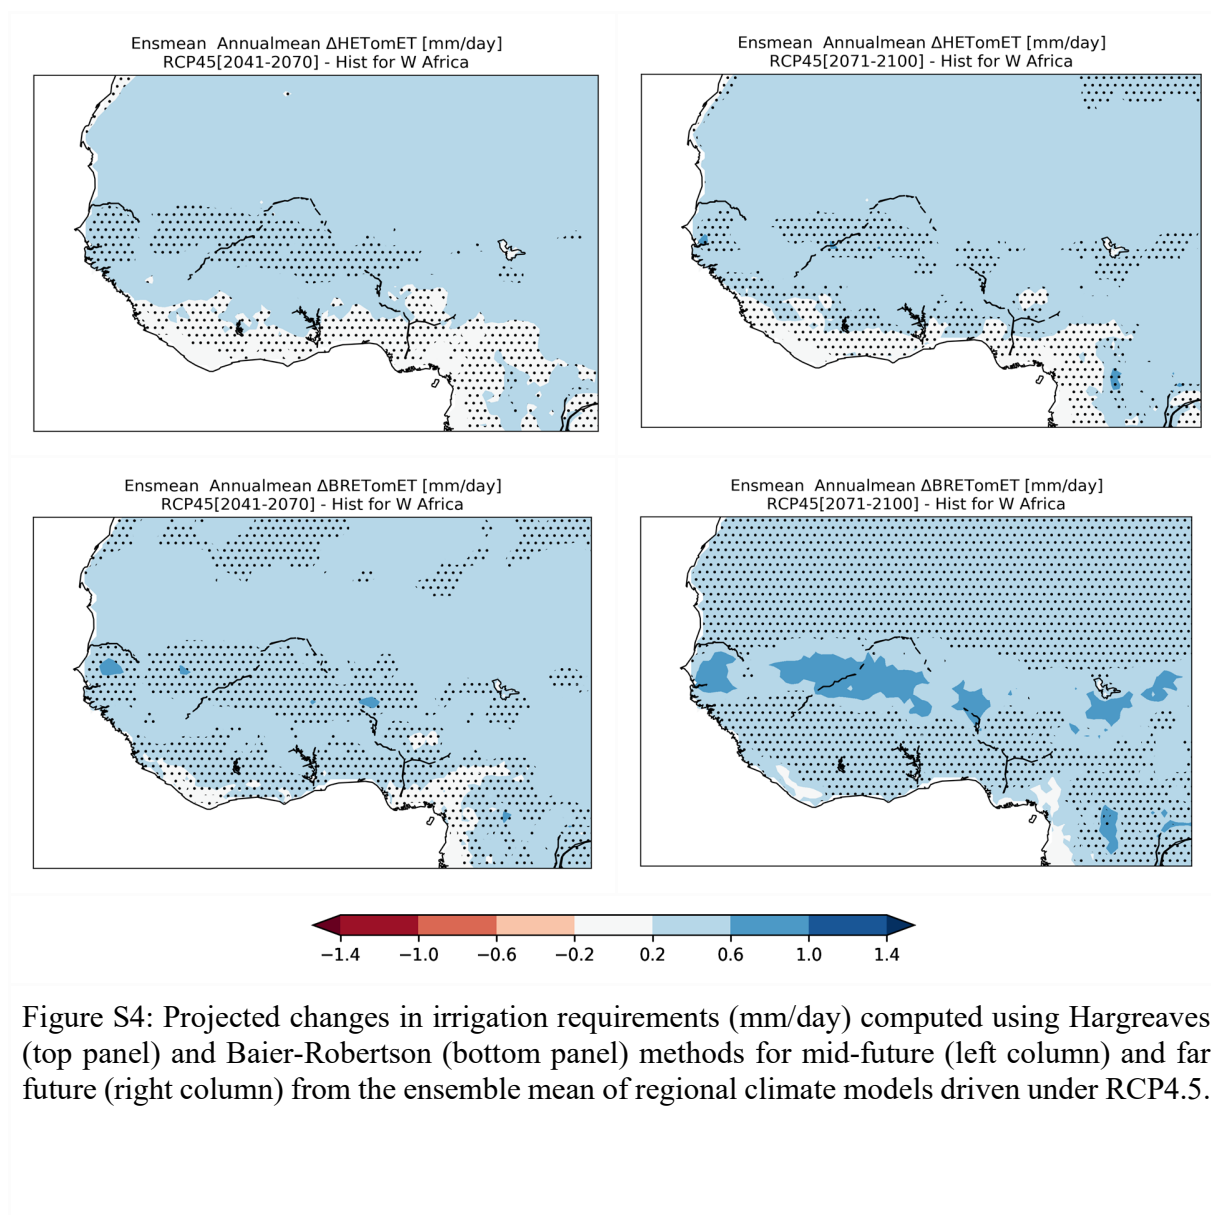

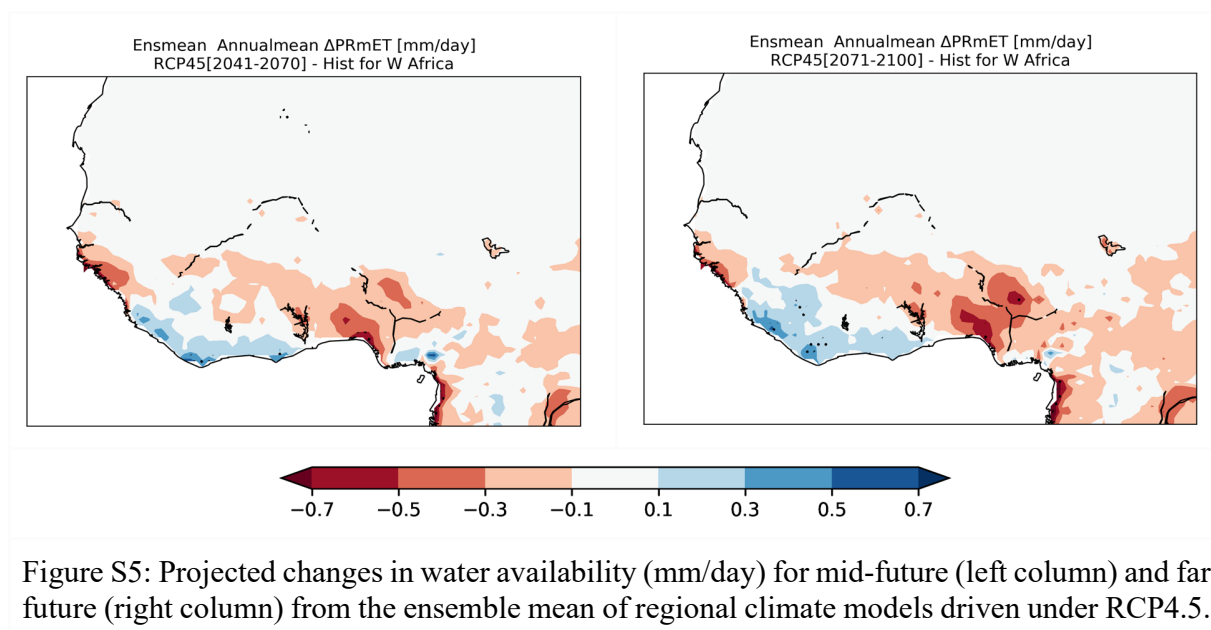

Supplement: s1 [file s1 › atmosphere-1730118-supplementary.pdf]
